# Supplementary material for: A Comparison of Blood Plasma Small Extracellular Vesicle Enrichment Strategies for Proteomic Analysis
Source: MDPI journal article supplement (doi:10.3390/proteomes10020019), 2022-06-01
Supplement: s1 [file s1]

## Supplementary Figures

Western blot full images

S1. BSA (SEC)

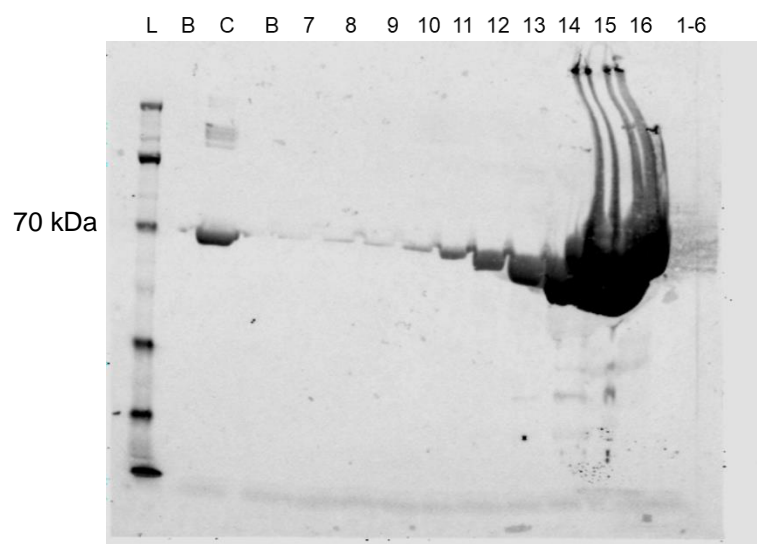

S2. BSA (UC+SEC)

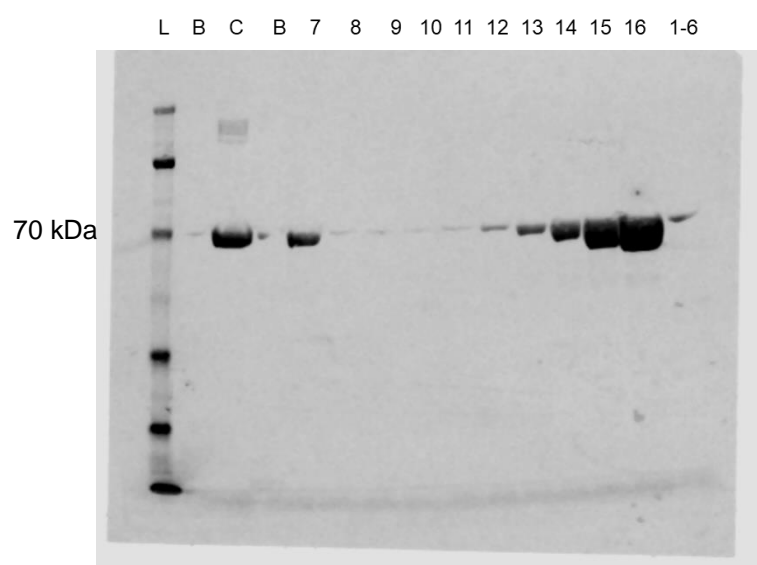

S3. FLOT-1

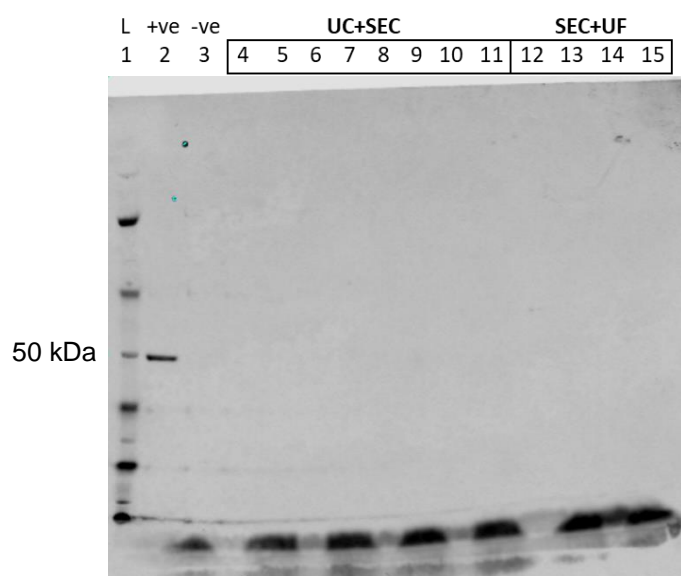

S4. FLOT-1

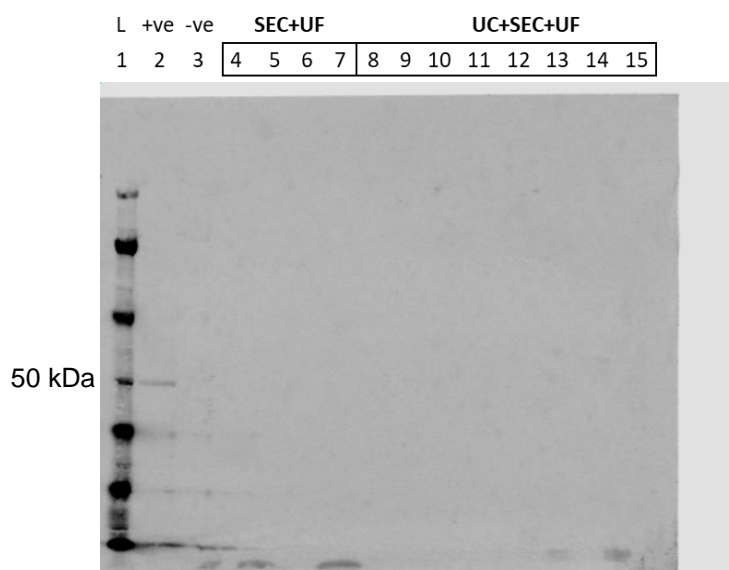

S5. FLOT-1

| L | +ve | -ve | SEC+UC |   |
|---|-----|-----|--------|---|
| 1 | 2   | 3   | 4      | 5 |

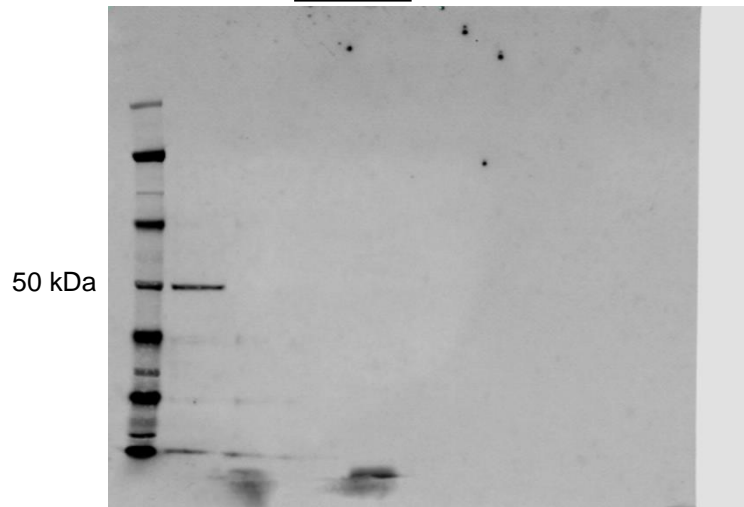

**Figures S3 – S5:** Western blot of Flotillin-1 (FLOT-1). L = ladder; +ve = positive control, 2.5  $\mu$ g JEG-3 cell lysate; -ve = negative control, 5  $\mu$ L de-ionized H<sub>2</sub>O. A and B: As annotated for each method, even-numbered lanes = pooled sEV fractions 7 – 10 resulting from SEC. Odd-numbered lanes = pooled non-sEV fractions 11 – 16 resulting from SEC. C: Lane 4; pooled sEV 7 – 10 fractions for all replicates; lane 5 = pooled non-sEV fractions 11 – 16 for all replicates. Predicted molecular weight of FLOT-1 = 47 kDa.

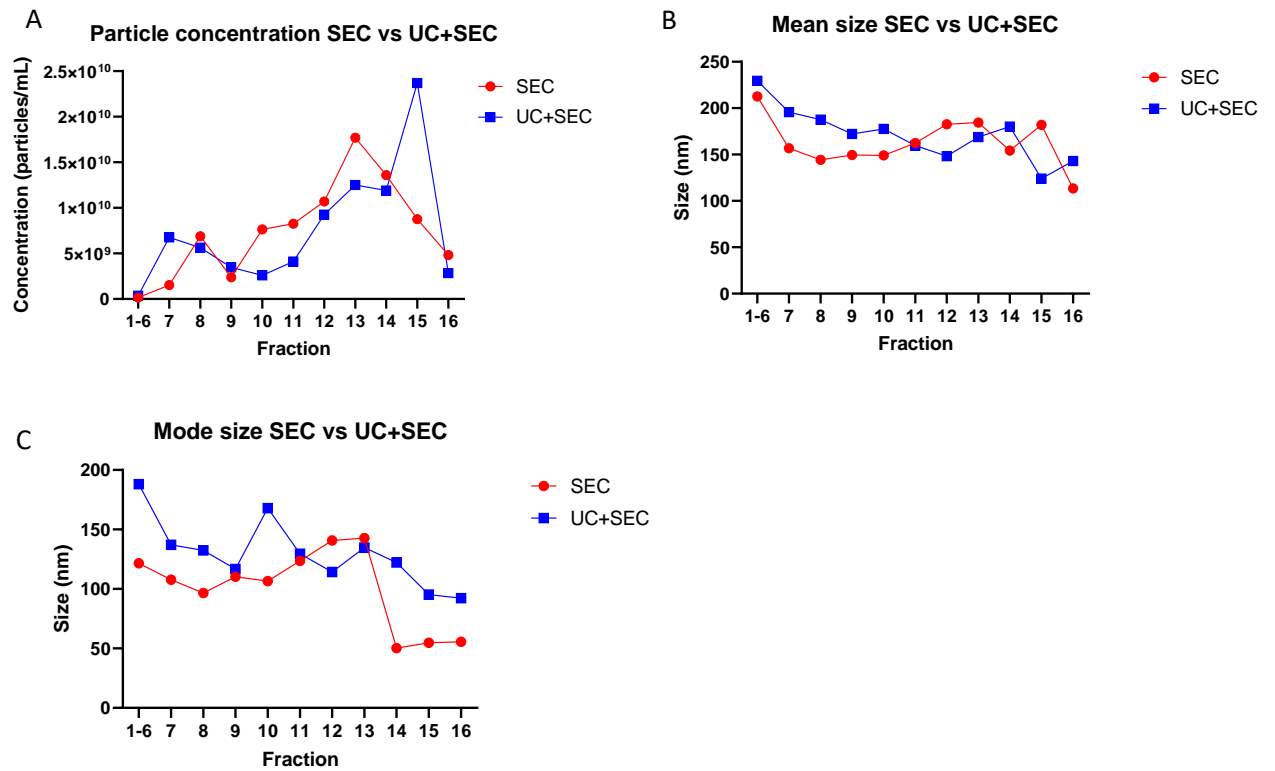

**Figure S6:** A) Particle concentration (particles/mL) distribution of SEC and UC+SEC fractions 1-6 (pool) and 7 – 16 individual fractions. Peak concentration of particles in sEV fractions 7 – 10 occurs in fraction 10 in SEC, and fraction 7 in UC+SEC. B) Mean and C) Mode size distributions of SEC and UC+SEC fractions 1 – 6 (pool) and individual fractions 7 – 16. All particles in sEV fractions 7 – 10 fell within small EV range (<200 nm). The mode size of SEC particles in sEV fractions 7 – 10 ranged from ~90 – 110. The mode size of UC+SEC particles in sEV fractions 7 – 10 ranged from ~116 – 167 nm.

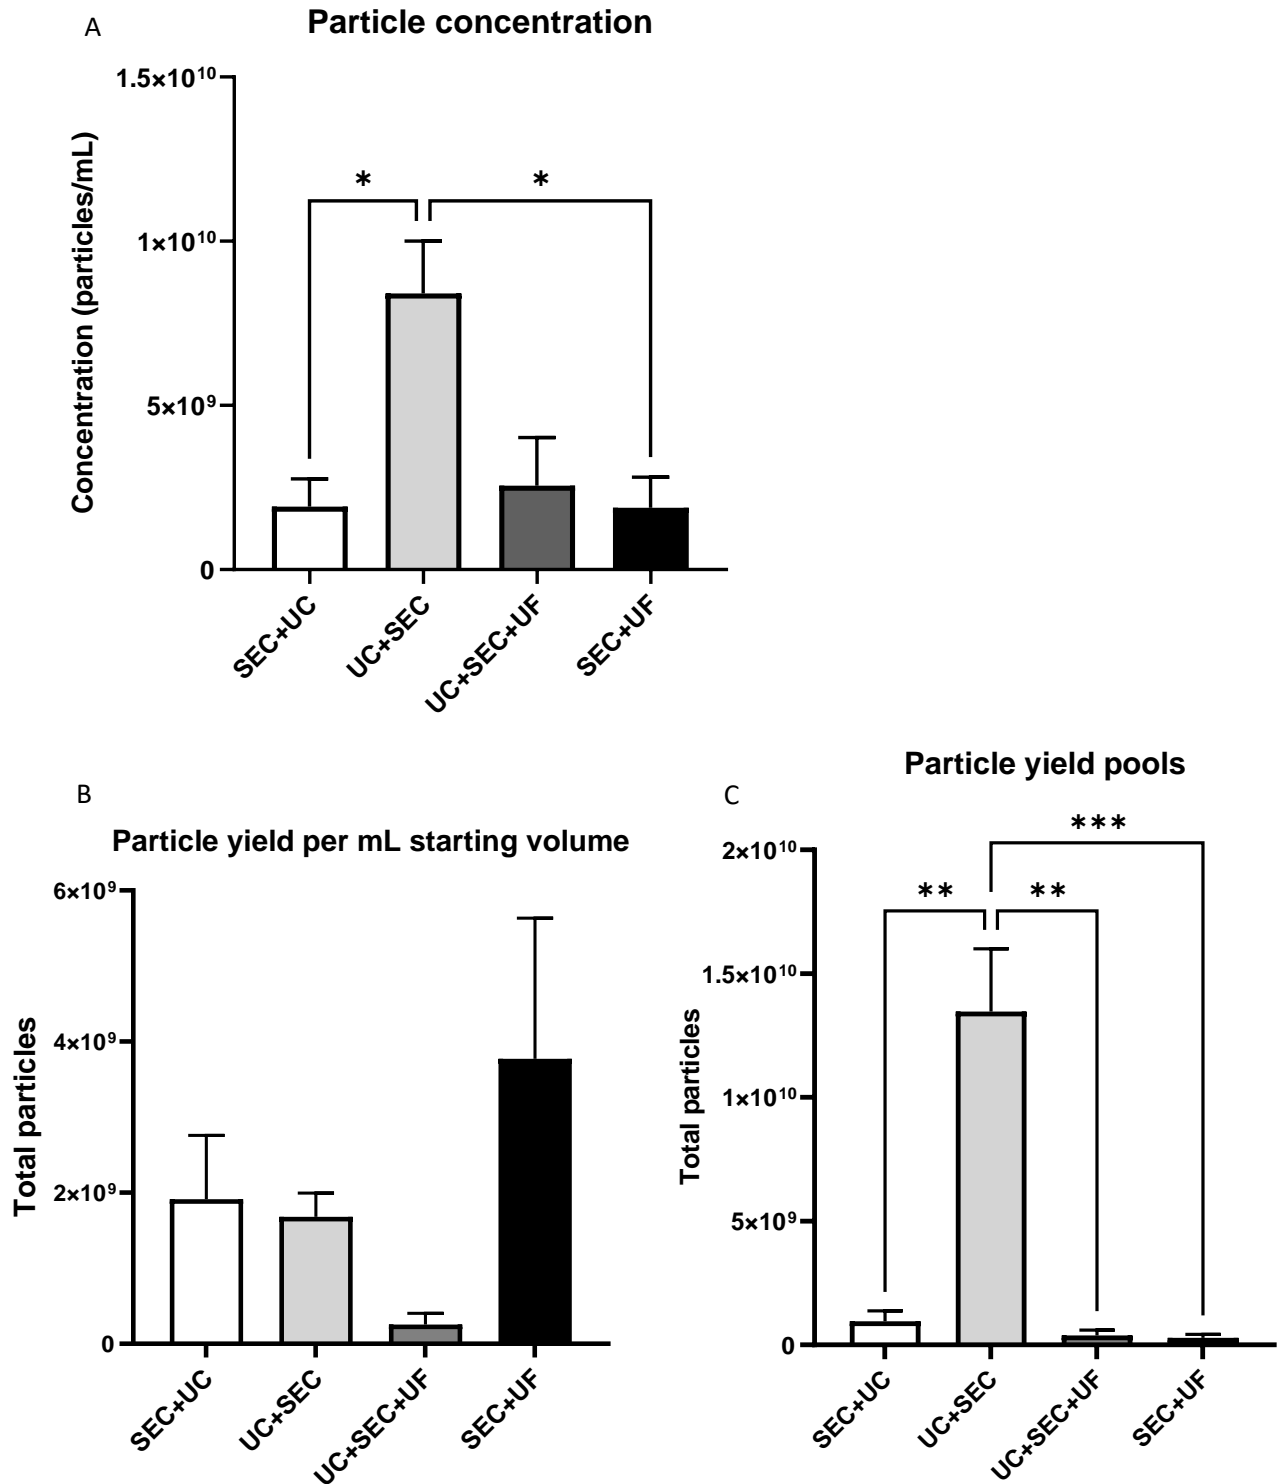

**Figure S7:** A) Particle concentration (particles/mL) in fraction 7 – 10 pools by all methods. UC+SEC > SEC+UC and SEC+UF. B) Particle yield (total particles) normalised per mL of starting volume of plasma, and C) particle yield (total particles) in fraction 7 – 10 pools by all methods. \* $p < 0.05$ , \*\* $p < 0.01$ , \*\*\* $p < 0.001$  (A-C: UC+SEC+UF,  $n = 3$ ; all other methods,  $n = 4$ ; error bars  $\pm$  SEM).

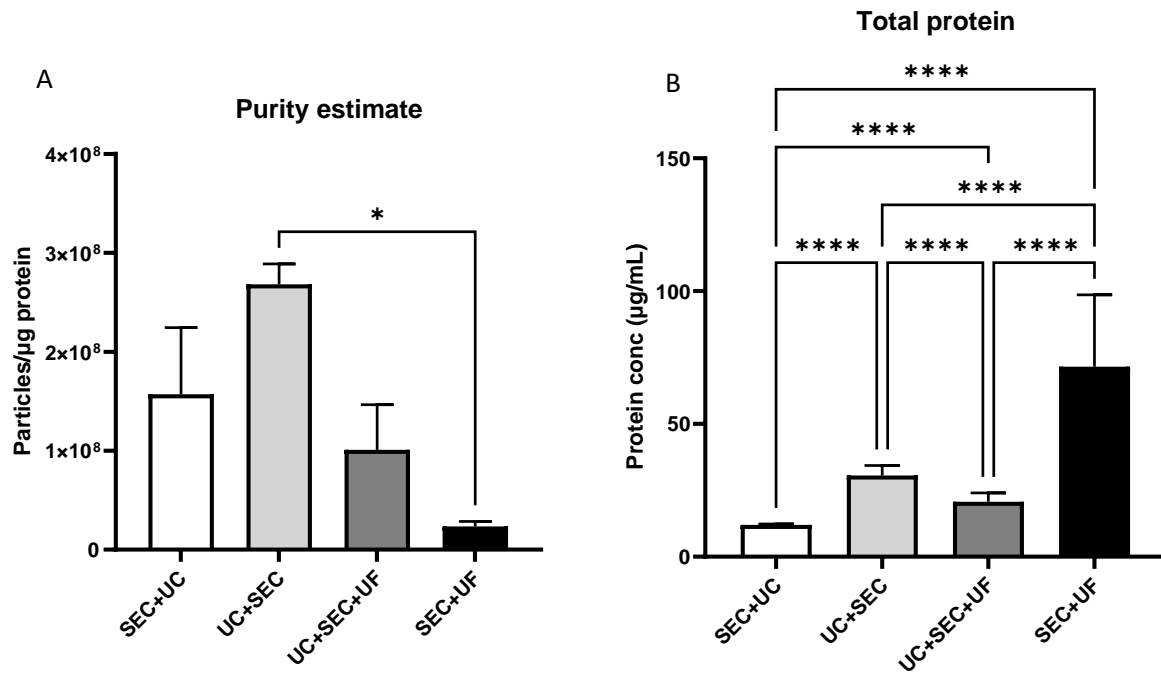

**Figure S8:** A) Purity estimate of particles obtained by all enrichment methods in pooled sEV fractions 7 – 10 ( $n = 3-4/\text{method}$ , error bars  $\pm$  SEM). B) Micro BCA assay results for sEV-enriched samples resulting from each method. Samples represent pooled sEV fractions 7 – 10. \* $p < 0.05$ , \*\* $p < 0.01$ , \*\*\* $p < 0.001$ , \*\*\*\* $p < 0.0001$  (A: UC+SEC+UF,  $n = 3$ ; all other methods,  $n = 4$ ; error bars  $\pm$  SEM; B:  $n = 4$  all methods; error bars  $\pm$  SEM).

## TEM images

S9.

A

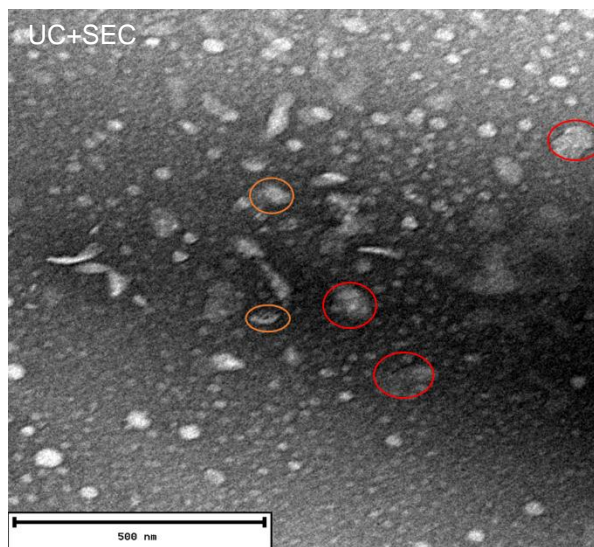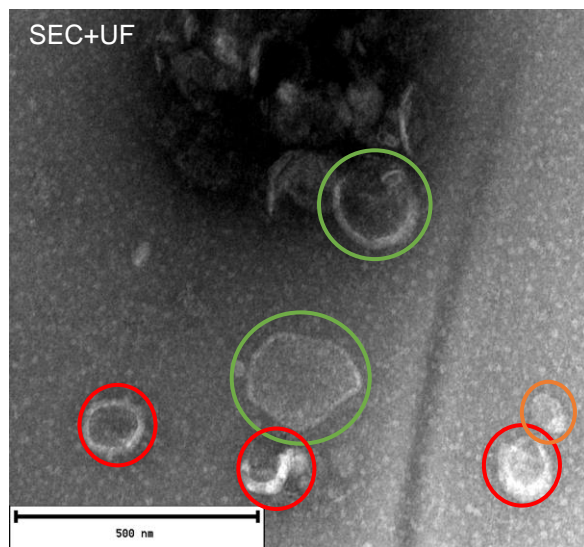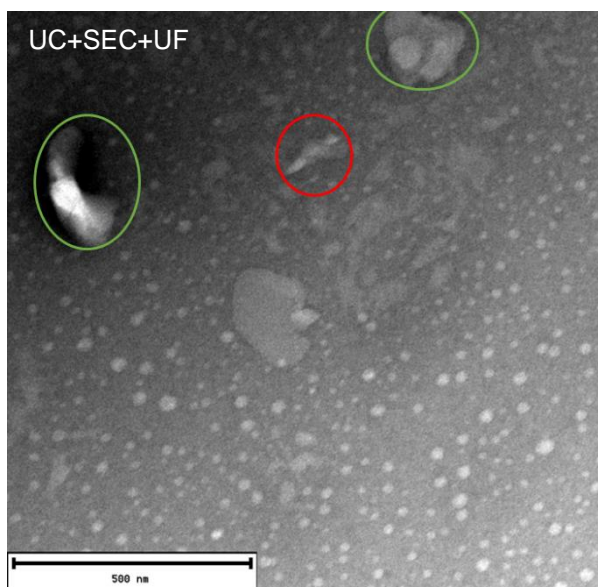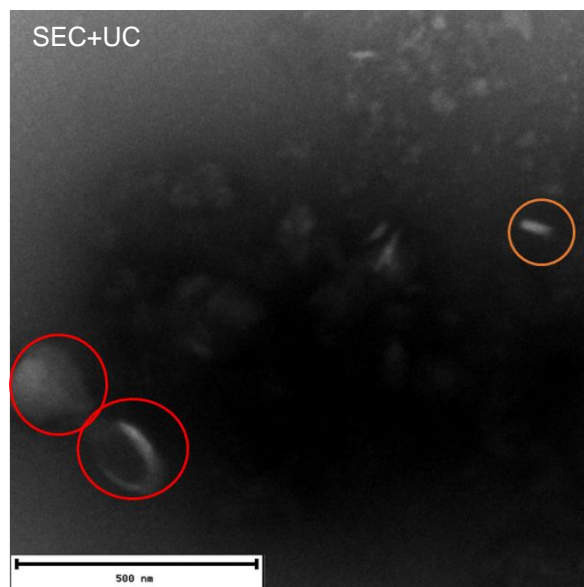

**B**

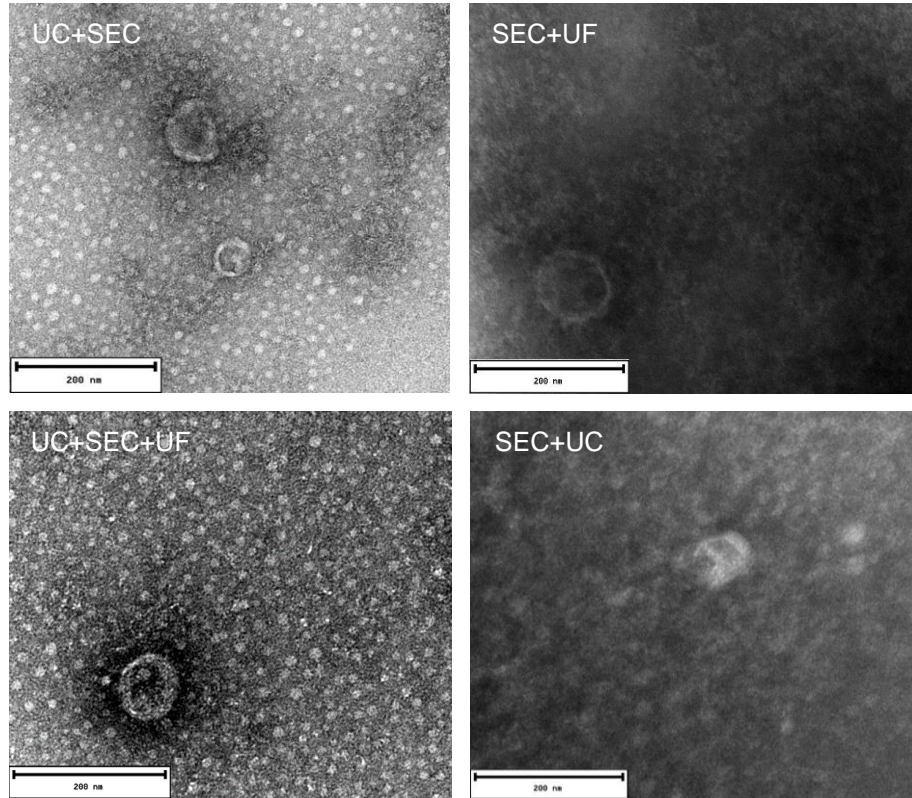

**Figure S9A and B:** Representative TEM images of pooled sEV fractions 7 – 10 by each of the four methods of sEV isolation and enrichment. **A:** Widefield view of sEV fractions 7 – 10. **B:** Single particle views of sEV fractions 7 – 10. Colour legend for circled particles in A: orange, < 75 nm; red, 75 – 150 nm; green, >150 nm.



S10. Non-sEV fraction pool 11 – 16 (UC+SEC). Scale bar = 500 nm.

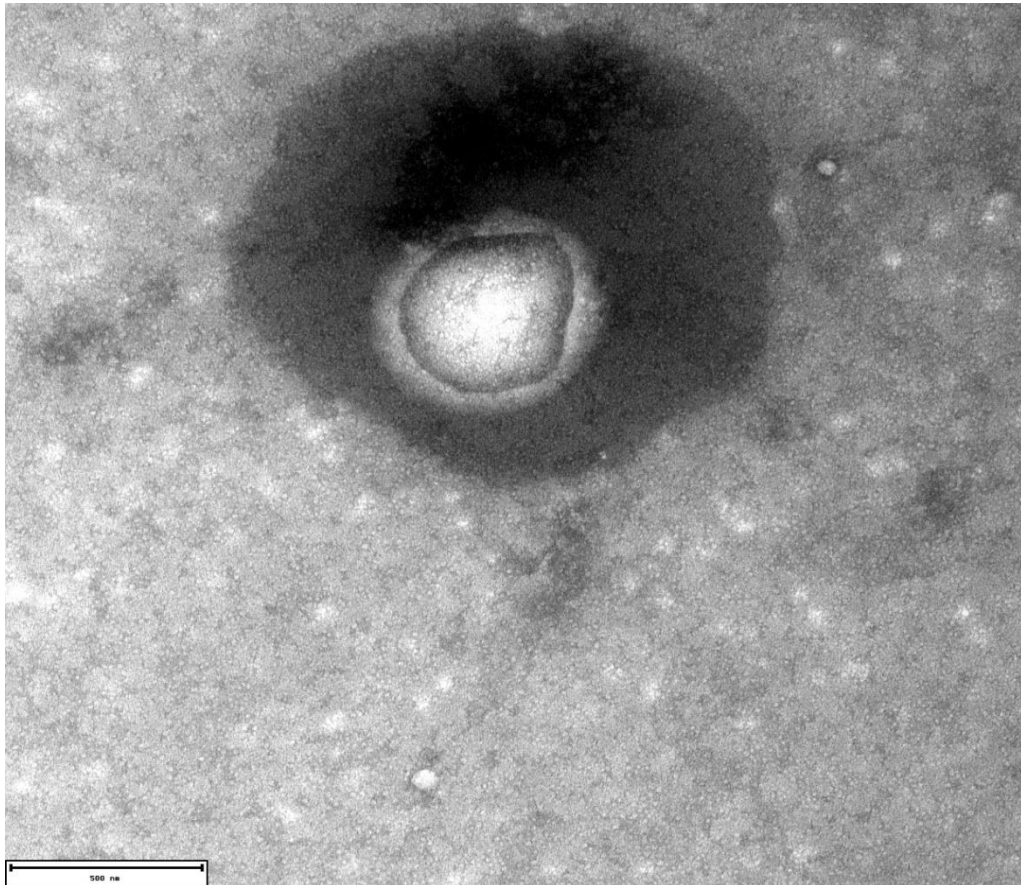

S11. Non-sEV fraction pool 11 – 16 (SEC+UC). Scale bar = 500 nm.

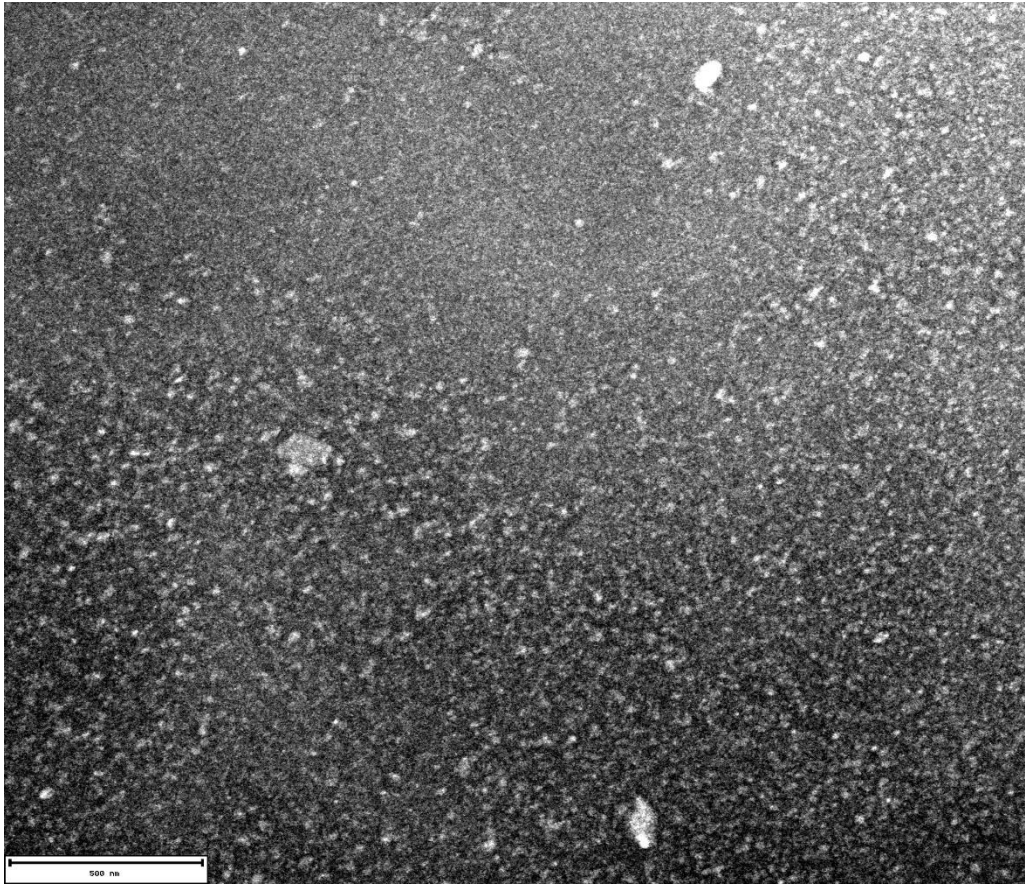

A

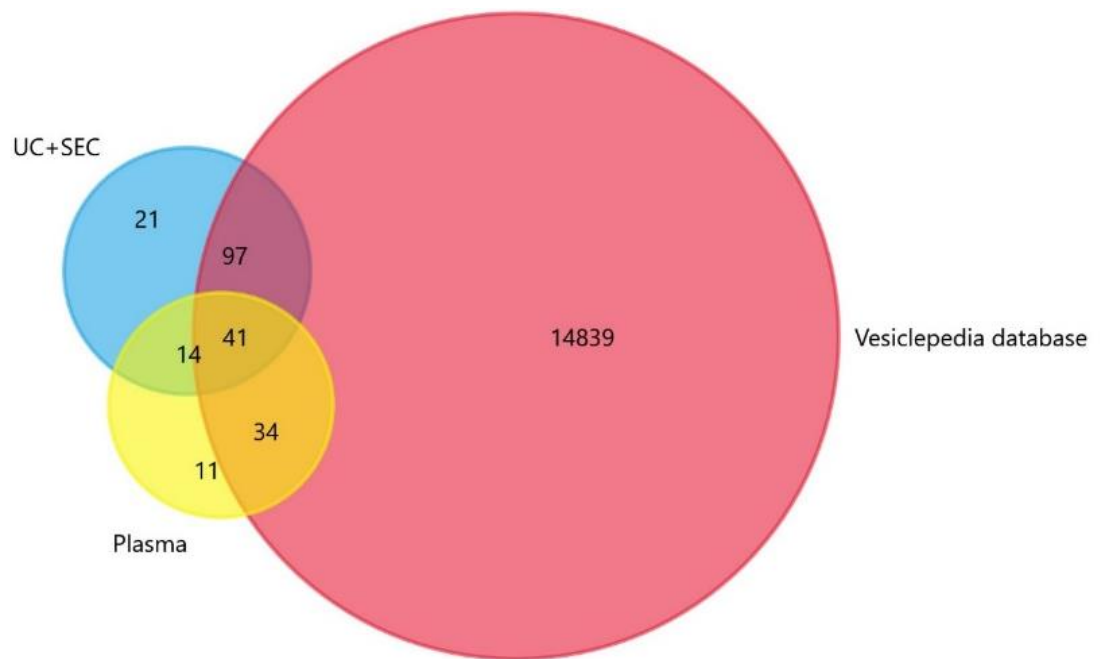

B

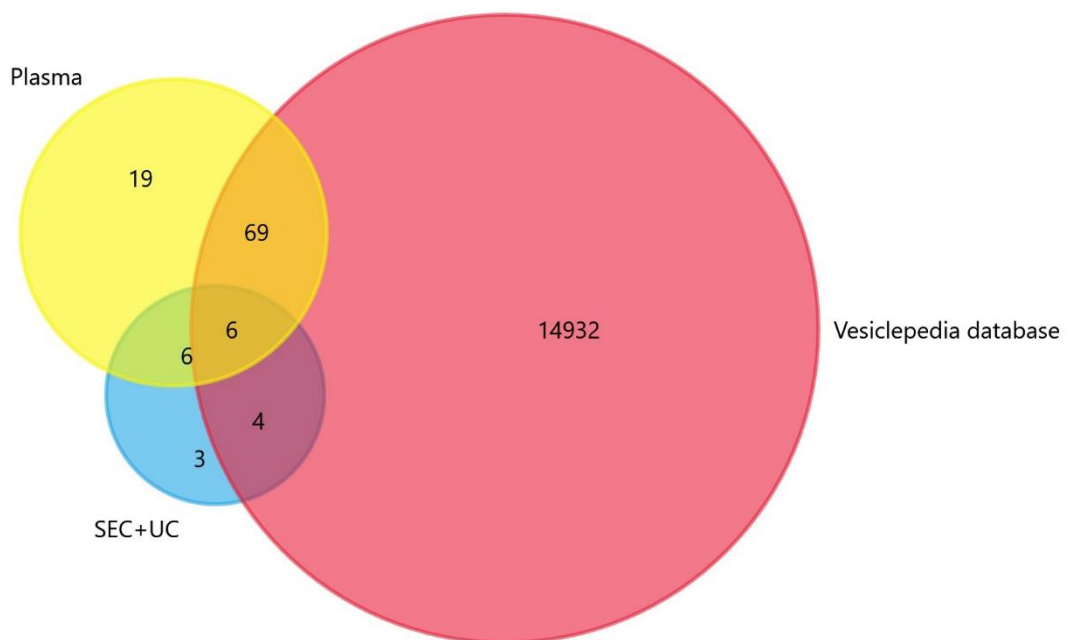

C

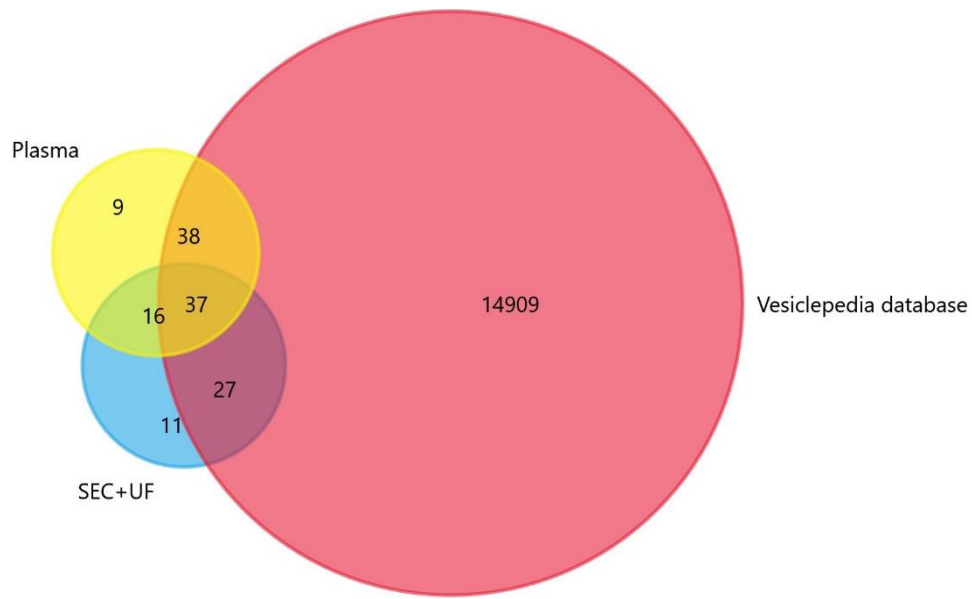

D

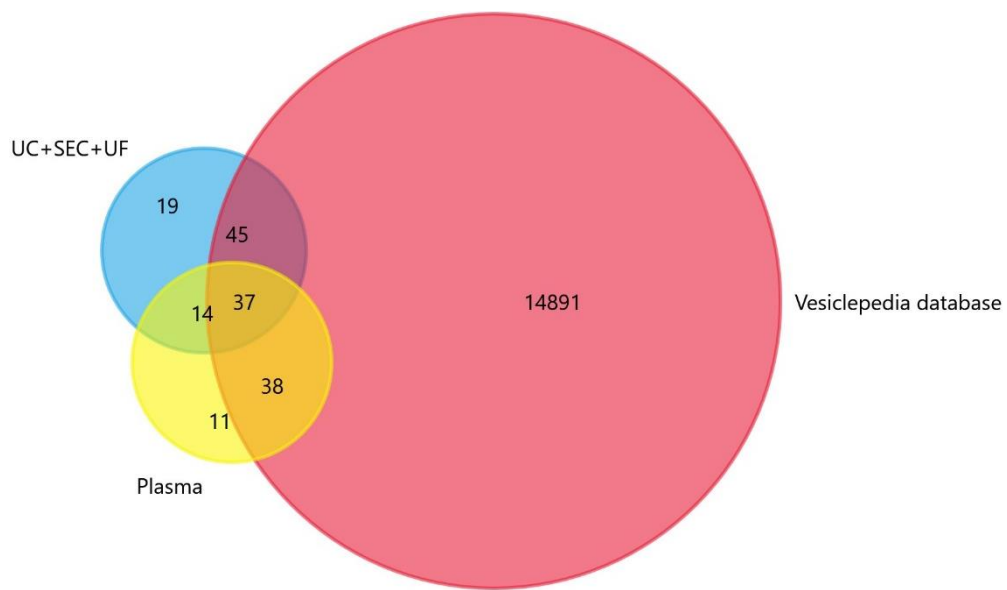

**Figure S12 (A-D):** Venn diagrams of shared and unique proteins of each sEV enrichment method compared with the complete Vesiclepedia protein database and plasma control.

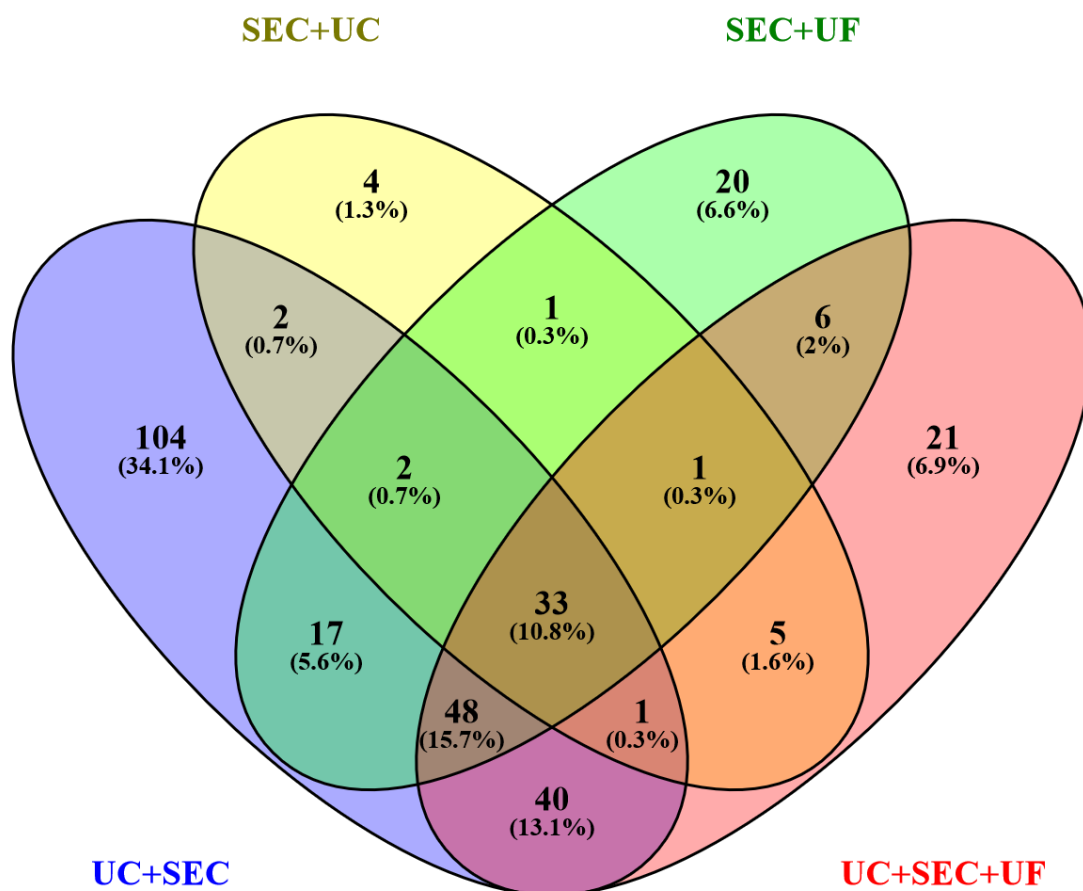

**Figure S13:** Venn diagram of shared and unique proteins for each method under study identified at 1% FDR protein level and 5% FDR peptide level.

**Table S1: Complete list of top 100 EV proteins (ExoCarta) identified in sEV samples and plasma.**

| <b>ExoCarta<br/>EV Protein</b> | <b>UC+SEC</b> | <b>UC+SEC+UF</b> | <b>SEC+UF</b> | <b>SEC+UC</b> | <b>Plasma</b> |
|--------------------------------|---------------|------------------|---------------|---------------|---------------|
| CD9                            | 1             | 1                | 1             | 0             | 0             |
| HSPA8                          | 1             | 0                | 0             | 0             | 0             |
| GAPDH                          | 1             | 0                | 0             | 0             | 0             |
| ACTB                           | 1             | 1                | 0             | 0             | 1             |
| SDCBP                          | 1             | 1                | 0             | 0             | 0             |
| HSP90AA1                       | 0             | 0                | 0             | 0             | 0             |
| PKM                            | 1             | 1                | 0             | 0             | 0             |
| LDHA                           | 0             | 0                | 0             | 0             | 1             |
| EEF1A1                         | 1             | 0                | 0             | 0             | 0             |
| YWHAZ                          | 1             | 0                | 0             | 0             | 0             |
| CLTC                           | 1             | 0                | 0             | 0             | 0             |
| CD81                           | 1             | 1                | 0             | 0             | 0             |
| ALB                            | 1             | 1                | 1             | 1             | 1             |
| VCP                            | 1             | 1                | 0             | 0             | 0             |
| MSN                            | 1             | 1                | 0             | 0             | 0             |
| CFL1                           | 1             | 0                | 0             | 0             | 0             |
| ITGB1                          | 0             | 1                | 0             | 0             | 0             |
| FLNA                           | 1             | 0                | 0             | 0             | 0             |
| YWHAG                          | 1             | 0                | 0             | 0             | 0             |
| A2M                            | 1             | 1                | 1             | 1             | 1             |
| TUBA1B                         | 1             | 0                | 0             | 0             | 0             |
| LGALS3BP                       | 1             | 1                | 1             | 1             | 0             |
| HSPA1A                         | 1             | 0                | 0             | 0             | 0             |
| PRDX2                          | 0             | 0                | 0             | 0             | 0             |
| ACTN4                          | 1             | 0                | 0             | 0             | 0             |
| LDHB                           | 1             | 0                | 0             | 0             | 1             |
| ACTG1                          | 0             | 0                | 1             | 0             | 1             |
| TFRC                           | 1             | 1                | 0             | 0             | 0             |
| THBS1                          | 1             | 1                | 1             | 0             | 0             |
| AHCY                           | 1             | 0                | 0             | 0             | 0             |
| STOM                           | 1             | 1                | 1             | 0             | 0             |
| MYH9                           | 1             | 0                | 0             | 0             | 0             |
| FN1                            | 1             | 1                | 1             | 0             | 0             |
| <b>Total</b>                   | <b>28</b>     | <b>15</b>        | <b>8</b>      | <b>3</b>      | <b>6</b>      |

**Table S2: Complete list of top 100 EV proteins (Vesiclepedia) identified in sEV samples and plasma.**

| <b>Vesiclepedia<br/>EV Marker</b> | <b>UC+SEC</b> | <b>UC+SEC+UF</b> | <b>SEC+UF</b> | <b>SEC+UC</b> | <b>Plasma</b> |
|-----------------------------------|---------------|------------------|---------------|---------------|---------------|
| GAPDH                             | 1             | 0                | 0             | 0             | 0             |
| HSPA8                             | 1             | 0                | 0             | 0             | 0             |
| ACTB                              | 1             | 1                | 0             | 0             | 1             |
| CD9                               | 1             | 1                | 1             | 0             | 0             |
| PKM                               | 1             | 1                | 0             | 0             | 0             |
| HSP90AA1                          | 0             | 0                | 0             | 0             | 0             |
| YWHAZ                             | 1             | 0                | 0             | 0             | 0             |
| YWHAE                             | 0             | 0                | 0             | 0             | 0             |
| EEF1A1                            | 1             | 0                | 0             | 0             | 0             |
| PGK1                              | 0             | 0                | 0             | 0             | 0             |
| CLTC                              | 1             | 0                | 0             | 0             | 0             |
| SDCBP                             | 1             | 1                | 0             | 0             | 0             |
| ALB                               | 1             | 1                | 1             | 1             | 1             |
| VCP                               | 1             | 1                | 0             | 0             | 0             |
| CFL1                              | 1             | 0                | 0             | 0             | 0             |
| MSN                               | 1             | 1                | 0             | 0             | 0             |
| MYH9                              | 1             | 0                | 0             | 0             | 0             |
| CD81                              | 1             | 1                | 0             | 0             | 0             |
| LDHB                              | 1             | 0                | 0             | 0             | 0             |
| ITGB1                             | 0             | 1                | 0             | 0             | 0             |
| LDHA                              | 0             | 0                | 0             | 0             | 1             |
| YWHAG                             | 1             | 0                | 0             | 0             | 0             |
| ACTN4                             | 1             | 0                | 0             | 0             | 0             |
| RAB5C                             | 0             | 0                | 0             | 0             | 0             |
| C3                                | 1             | 1                | 1             | 1             | 1             |
| FN1                               | 1             | 1                | 1             | 0             | 0             |
| AHCY                              | 1             | 0                | 0             | 0             | 0             |
| A2M                               | 1             | 1                | 1             | 1             | 1             |
| ACTN1                             | 1             | 0                | 0             | 0             | 0             |
| FLNA                              | 1             | 0                | 0             | 0             | 0             |
| GSN                               | 1             | 0                | 0             | 0             | 0             |
| PRDX2                             | 0             | 0                | 0             | 0             | 0             |
| LGALS3BP                          | 1             | 1                | 1             | 1             | 0             |
| KRT10                             | 0             | 0                | 0             | 0             | 1             |
| CAP1                              | 1             | 1                | 0             | 0             | 0             |
| TFRC                              | 1             | 1                | 0             | 0             | 0             |
| TLN1                              | 1             | 0                | 0             | 0             | 0             |
| TUBA4A                            | 1             | 1                | 0             | 0             | 0             |
| TUBB1                             | 1             | 0                | 0             | 0             | 0             |
| <b>Total</b>                      | <b>31</b>     | <b>16</b>        | <b>6</b>      | <b>4</b>      | <b>6</b>      |

**Table S3: Number of peptides identified for abundant plasma proteins in sEV enriched samples from the four enrichment methods and plasma control.**

| Commonly identified plasma proteins        | Number of peptide IDs |           |        |        |        |
|--------------------------------------------|-----------------------|-----------|--------|--------|--------|
|                                            | UC+SEC                | UC+SEC+UF | SEC+UF | SEC+UC | Plasma |
| Albumin                                    | 61                    | 61        | 120    | 94     | 391    |
| $\alpha$ 1-Antitrypsin                     | 8                     | 5         | 10     | 2      | 26     |
| IgA/IgM                                    | 25                    | 25        | 23     | 6      | 4      |
| Transferrin                                | 0                     | 25        | 0      | 0      | 129    |
| Haptoglobin                                | 10                    | 11        | 0      | 0      | 3      |
| $\alpha$ 2-Macroglobulin                   | 200                   | 137       | 245    | 29     | 164    |
| Fibrinogen                                 | 91                    | 69        | 159    | 17     | 49     |
| Complement C3                              | 71                    | 55        | 76     | 14     | 148    |
| $\alpha$ 1-Acid Glycoprotein (Orosomucoid) | 0                     | 0         | 0      | 0      | 14     |
| HDL (Apolipoprotein A-I)                   | 28                    | 23        | 37     | 14     | 51     |
| HDL (Apolipoprotein A-II)                  | 2                     | 2         | 2      | 0      | 4      |
| LDL (mainly Apolipoprotein B)              | 11                    | 5         | 74     | 0      | 38     |
| Haemoglobin subunit alpha                  | 7                     | 6         | 0      | 0      | 8      |
| Haemoglobin subunit beta                   | 15                    | 12        | 9      | 2      | 14     |

**Table S4: GO pathway analysis of proteins identified in each sEV-enrichment method.** Values represent percentage of total protein IDs. Green = increased in sEV methods and not in plasma. Orange = increased in sEV methods and present in plasma. Red = associated with plasma proteins.

| GO pathway                                                               | UC+SEC | UC+SEC+UF | SEC+UF | SEC+UC | Plasma Control |
|--------------------------------------------------------------------------|--------|-----------|--------|--------|----------------|
| Alzheimer disease-presenilin pathway                                     | 2.4    | 5.3       | 3.6    | 0      | 0              |
| Angiogenesis                                                             | 0      | 0         | 0      | 0      | 6.5            |
| Angiotensin II-stimulated signaling through G proteins and beta-arrestin | 0      | 0         | 0      | 0      | 3.2            |
| Blood coagulation                                                        | 24.4   | 21.1      | 28.6   | 44.4   | 38.7           |
| Cadherin signaling pathway                                               | 9.8    | 10.5      | 3.6    | 0      | 0              |
| CCKR signaling map                                                       | 7.3    | 15.8      | 10.7   | 0      | 6.5            |
| Cytoskeletal regulation by Rho GTPase                                    | 2.4    | 0         | 0      | 0      | 0              |
| Huntington disease                                                       | 2.4    | 0         | 3.6    | 0      | 0              |
| Integrin signalling pathway                                              | 14.6   | 10.5      | 7.1    | 11.1   | 6.5            |
| p53 pathway                                                              | 4.9    | 5.3       | 3.6    | 0      | 0              |
| Parkinson disease                                                        | 0      | 0         | 3.6    | 0      | 3.2            |
| Ras Pathway                                                              | 0      | 0         | 7.1    | 0      | 6.5            |
| T cell activation                                                        | 0      | 0         | 0      | 0      | 6.5            |
| Wnt signaling pathway                                                    | 9.8    | 10.5      | 3.6    | 0      | 0              |



**Table S5:** List of commonly identified proteins and gene ontology from all methods of sEV enrichment.

| Uniprot Accession ID | Gene Name/Gene Symbol/Ortholog                   | PANTHER Family/Subfamily                                       | PANTHER Protein Class                             |
|----------------------|--------------------------------------------------|----------------------------------------------------------------|---------------------------------------------------|
| A0A140T897           | Albumin;ALB;ortholog                             | ALBUMIN (PTHR11385:SF15)                                       | transfer/carrier protein(PC00219)                 |
| A0A3Q1LPG0           | Uncharacterized protein;unassigned;ortholog      | IMMUNOGLOBULIN HEAVY CONSTANT GAMMA 1-RELATED (PTHR23411:SF39) | immunoglobulin receptor superfamily(PC00124)      |
| A0A3Q1M3L6           | Uncharacterized protein;unassigned;ortholog      | IMMUNOGLOBULIN HEAVY CONSTANT GAMMA 1-RELATED (PTHR23411:SF39) | immunoglobulin receptor superfamily(PC00124)      |
| A0A3Q1M564           | Adiponectin;ADIPOQ;ortholog                      | ADIPONECTIN (PTHR15427:SF20)                                   | scaffold/adaptor protein(PC00226)                 |
| A6QNW7               | CD5 molecule like;CD5L;ortholog                  | CD5 ANTIGEN-LIKE (PTHR48071:SF8)                               |                                                   |
| A7E3W2               | Galectin-3-binding protein;LGALS3BP;ortholog     | GALECTIN-3-BINDING PROTEIN (PTHR24410:SF16)                    | defense/immunity protein(PC00090)                 |
| F1MLW8               | Uncharacterized protein;LOC100847119;ortholog    | IG-LIKE DOMAIN-CONTAINING PROTEIN (PTHR23267:SF493)            | immunoglobulin(PC00123)                           |
| F1N3Q7               | Apolipoprotein A-IV;APOA4;ortholog               | APOLIPOPROTEIN A-IV (PTHR18976:SF1)                            | apolipoprotein(PC00052)                           |
| F6QND5               | Fibrinogen alpha chain;FGA;ortholog              | FIBRINOGEN ALPHA CHAIN (PTHR47221:SF3)                         |                                                   |
| G3N0S9               | Uncharacterized protein;unassigned;ortholog      |                                                                |                                                   |
| G3N0V0               | Uncharacterized protein;unassigned;ortholog      | IMMUNOGLOBULIN HEAVY CONSTANT GAMMA 1-RELATED (PTHR23411:SF39) | immunoglobulin receptor superfamily(PC00124)      |
| G5E513               | Uncharacterized protein;unassigned;ortholog      | IMMUNOGLOBULIN HEAVY CONSTANT MU (PTHR23411:SF35)              | immunoglobulin receptor superfamily(PC00124)      |
| G5E5T5               | Uncharacterized protein;unassigned;ortholog      | IG-LIKE DOMAIN-CONTAINING PROTEIN (PTHR19944:SF98)             | major histocompatibility complex protein(PC00149) |
| O02659               | Mannose-binding protein C;MBL;ortholog           | MANNOSE-BINDING PROTEIN C (PTHR24024:SF34)                     | surfactant(PC00212)                               |
| P00974               | Pancreatic trypsin inhibitor;unassigned;ortholog | SPLEEN TRYPSIN INHIBITOR I (PTHR10083:SF367)                   | protease inhibitor(PC00191)                       |
| P02070               | Hemoglobin subunit beta;HBB;ortholog             | HEMOGLOBIN SUBUNIT BETA (PTHR11442:SF42)                       | globin(PC00107)                                   |

|            |                                                     |                                                        |                                                  |
|------------|-----------------------------------------------------|--------------------------------------------------------|--------------------------------------------------|
| P12763     | Alpha-2-HS-glycoprotein;AHSG;ortholog               | ALPHA-2-HS-GLYCOPROTEIN (PTHR13814:SF6)                | protease inhibitor(PC00191)                      |
| P15497     | Apolipoprotein A-I;APOA1;ortholog                   | APOLIPOPROTEIN A-I (PTHR18976:SF11)                    | apolipoprotein(PC00052)                          |
| P23805     | Conglutinin;CGN1;ortholog                           | COLLAGEN ALPHA-1(X) CHAIN (PTHR24023:SF880)            | extracellular matrix structural protein(PC00103) |
| P34955     | Alpha-1-antiproteinase;SERPINA1;ortholog            | ALPHA-1-ANTITRYPSIN (PTHR11461:SF165)                  | protease inhibitor(PC00191)                      |
| Q2KIV9     | Complement C1q subcomponent subunit B;C1QB;ortholog | COMPLEMENT C1Q SUBCOMPONENT SUBUNIT B (PTHR15427:SF18) | scaffold/adaptor protein(PC00226)                |
| Q2UVX4     | Complement C3;C3;ortholog                           | COMPLEMENT C3 (PTHR11412:SF81)                         | protease inhibitor(PC00191)                      |
| Q3SYR8     | Immunoglobulin J chain;JCHAIN;ortholog              | IMMUNOGLOBULIN J CHAIN (PTHR10070:SF2)                 | immunoglobulin(PC00123)                          |
| Q5E9E3     | Complement C1q subcomponent subunit A;C1QA;ortholog | COMPLEMENT C1Q SUBCOMPONENT SUBUNIT A (PTHR15427:SF26) | scaffold/adaptor protein(PC00226)                |
| Q7SIH1     | Alpha-2-macroglobulin;A2M;ortholog                  | ALPHA-2-MACROGLOBULIN (PTHR11412:SF165)                | protease inhibitor(PC00191)                      |
| A5D9E9     | Complement subcomponent C1r                         | Not mapped in PANTHER                                  |                                                  |
| G3MXB5     | Uncharacterized protein                             | Not mapped in PANTHER                                  |                                                  |
| F1N5M2     | Gc-globulin                                         | Not mapped in PANTHER                                  |                                                  |
| A0A3Q1LPF0 | Apolipoprotein E                                    | Not mapped in PANTHER                                  |                                                  |
| G3MWT1     | Ig-like domain-containing protein                   | Not mapped in PANTHER                                  |                                                  |
| A0A3Q1M032 | Uncharacterized protein                             | Not mapped in PANTHER                                  |                                                  |
| F1MZ96     | Uncharacterized protein                             | Not mapped in PANTHER                                  |                                                  |
| A0A3Q1MNN6 | Uncharacterized protein                             | Not mapped in PANTHER                                  |                                                  |

### Production of StageTips.

Two Empore SCX membrane disks were placed on top of each other and on top of a paper disk in a clean Petri dish. A blunt-end 18g needle was attached to a 1 mL syringe and filled with air. The needle was pressed firmly into the membrane and rotated clockwise to cut out the disks. The syringe and needle containing the double SCX membrane material was inserted into a 300 uL white robotic tip (Eppendorf, cat no: 0030 014.464) and the plunger depressed rapidly down to create positive pressure and eject the membrane into the pipette tip. This was repeated, if necessary, until the double membrane was sitting firmly at the end of the pipette tip.
